# Supplementary material for: Validity of the Stages of Change in Steps instrument (SoC-Step) for achieving the physical activity goal of 10,000 steps per day
Source: Springer Nature journal article supplement (doi:10.1186/s12889-015-2539-y), 2015-11-30
Supplement: MOESM1 [file 9750918]

**INSTRUCTIONS: Before completing the questionnaire, please read the following information on the number of steps adults take each day.**

**1. Both men and women can accumulate steps throughout the day in a number of ways:**

- doing chores or working around the house
- running errands or going to the shops
- walking from place to place
- doing exercise or playing sports
- doing things such as going up the stairs, walking to the car, walking from one room to another, and so on.

**2. We might not know it, but large contributions to daily steps come from:**

- having an active job (4000 to 9000 steps at work)
- having an inactive or office job (1000 to 4000 steps at work)
- a session of moderate-intensity walking or exercise (3000-4000 steps in 30 minutes of walking, which is more than 100 steps per minute)

**3. Studies have shown that:**

- for healthy adults, jobs and the activities of daily living typically result in about 6000-7000 steps/day.
- adults who do 30 minutes of walking or other exercise may attain an additional 3000-4000 steps/day.
- most healthy adults accumulate between 3000 and 9000 steps per day.

**4. We can use the following categories to describe activity levels by steps:**

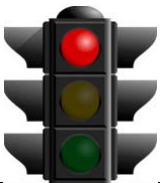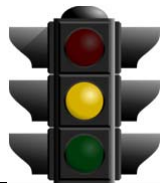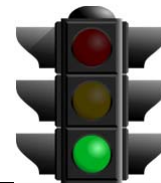

|                                                                                                                                                                       |                                                                                                                                                                         |                                                                                                                                                                            |                                                                                                                                                                                            |                                                                                                                                                                                                       |
|-----------------------------------------------------------------------------------------------------------------------------------------------------------------------|-------------------------------------------------------------------------------------------------------------------------------------------------------------------------|----------------------------------------------------------------------------------------------------------------------------------------------------------------------------|--------------------------------------------------------------------------------------------------------------------------------------------------------------------------------------------|-------------------------------------------------------------------------------------------------------------------------------------------------------------------------------------------------------|
| <p><b>Less than 5000 steps/day = <u>sedentary lifestyle:</u></b></p> <p>typically minimal activities of daily living and inactive work, likely no sports/exercise</p> | <p><b>5000-7499 steps/day = <u>low active:</u></b></p> <p>typically some physical activity from activities of daily living on a work day, excluding sports/exercise</p> | <p><b>7500-9999 steps/day = <u>somewhat active:</u></b></p> <p>likely to have additional activity beyond activities of daily living from sports/exercise or active job</p> | <p><b>10,000-12,499 steps/day = <u>active:</u></b></p> <p>likely to have substantial additional physical activity beyond activities of daily living from sports/exercise or active job</p> | <p><b>12,500+ steps/day = <u>highly active:</u></b></p> <p>likely to have very substantial additional physical activity beyond activities of daily living from sports/exercise or very active job</p> |
|-----------------------------------------------------------------------------------------------------------------------------------------------------------------------|-------------------------------------------------------------------------------------------------------------------------------------------------------------------------|----------------------------------------------------------------------------------------------------------------------------------------------------------------------------|--------------------------------------------------------------------------------------------------------------------------------------------------------------------------------------------|-------------------------------------------------------------------------------------------------------------------------------------------------------------------------------------------------------|

Go on to the next page →

# Stage of step taking

**INSTRUCTIONS:** Please tick **only one box** below to indicate which the statements best applies to you:

Currently, **I take enough steps** (10,000 steps per day) to receive health benefits.

AND

I have been physically active at this level **for more than SIX months**.

Currently, **I take enough steps** (10,000 steps per day) to receive health benefits.

BUT

I have only been physically active at this level **for the past six months or less**.

Currently, **I do NOT take enough steps** (10,000 steps per day) to receive health benefits.

BUT

**I do intend to** be physically active at a level of taking 10,000 steps or more on most days, if not all days of the week **within the next ONE month**.

Currently, **I do NOT take enough steps** (10,000 steps per day) to receive health benefits.

BUT

**I do intend to** be physically active at a level of taking 10,000 steps or more on most days, if not all days of the week **within the next SIX months**.

Currently, **I do NOT take enough steps** (10,000 steps per day) to receive health benefits.

AND

**I do NOT intend to** be physically active at a level of taking 10,000 steps or more on most days, if not all days of the week **within the next six months**.
